# Supplementary material for: The structural evolution and spectral blue shift of solid solution phosphors Sr3−mCamB2O6:Eu2+
Source: Royal Society of Chemistry journal article supplement (doi:10.1039/c6ce00832a), 2016-01-01
Supplement: c6ce00832a1.pdf [file c6ce00832a1.pdf]

## Supplementary information

### Structural evolution and spectral blue shift of solid solution

#### phosphors $\text{Sr}_{3-m}\text{Ca}_m\text{B}_2\text{O}_6$ : $\text{Eu}^{2+}$

Zhongxian Qiu<sup>ab</sup>, Hongzhou Lian<sup>a</sup>, Mengmeng Shang<sup>a</sup>, Shixun Lian<sup>\*b</sup> and Jun Lin<sup>\*a</sup>

<sup>a</sup> State Key Laboratory of Rare Earth Resource Utilization, Changchun Institute of Applied Chemistry, Chinese Academy of Sciences, Changchun 130022, P. R. China. Email: [jlin@ciac.ac.cn](mailto:jlin@ciac.ac.cn)

<sup>b</sup> Key Laboratory of Chemical Biology & Traditional Chinese Medicine Research (Ministry of Education), College of Chemistry and Chemical Engineering, Hunan Normal University, Changsha, Hunan 410081, People's Republic of China. E-mail: [sxlian@hunnu.edu.cn](mailto:sxlian@hunnu.edu.cn)

#### S1 The CIE chromaticity diagram of the solid solution phosphors $\text{Sr}_{2.96-m}\text{Ca}_m\text{B}_2\text{O}_6$ : $0.04\text{Eu}^{2+}$ .

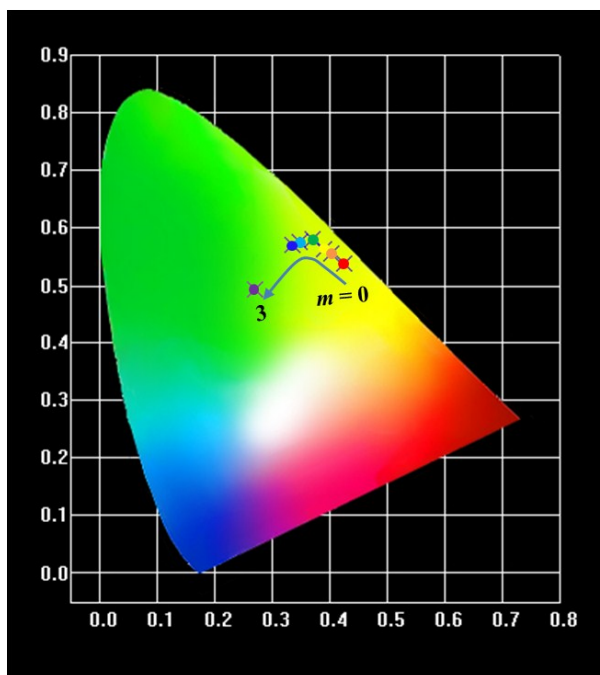

Fig. S1 The CIE chromaticity diagram of  $\text{Sr}_{2.96-m}\text{Ca}_m\text{B}_2\text{O}_6$ :  $0.04\text{Eu}^{2+}$ .
